# Supplementary material for: Development Of A Computer-Adaptive Version Of The Forgotten Joint Score
Source: PubMed Central journal article supplement — J Arthroplasty. 2013 Mar;28(3):418–22. doi: 10.1016/j.arth.2012.08.026 (PMC3587796; doi:10.1016/j.arth.2012.08.026), 2013-03
Supplement: mmc3.pdf [file mmc3.pdf]

# CONFLICT OF INTEREST STATEMENT

## *The Journal of Arthroplasty*

(Adopted from the American Academy of Orthopaedic Surgeons disclosure statement)

The following form **must be filled out completely and submitted by each author (example, 6 authors, 6 forms). If no disclosure is required, please write/type "none" at the end of each sentence.**

Manuscript Title \_\_\_\_\_

1. Royalties from a company or supplier (The following conflicts were disclosed) **NONE**
2. Speakers bureau/paid presentations for a company or supplier (The following conflicts were disclosed) **NONE**
- 3A. Paid employee for a company or supplier (The following conflicts were disclosed) **NONE**
- 3B. Paid consultant for a company or supplier (The following conflicts were disclosed) **NONE**
- 3C. Unpaid consultants for a company or supplier (The following conflicts were disclosed) **NONE**
4. Stock or stock options in a company or supplier (The following conflicts were disclosed) **NONE**
5. Research support from a company or supplier as a Principal Investigator (The following conflicts were disclosed) **NONE**
6. Other financial or material support from a company or supplier (The following conflicts were disclosed) **NONE**
7. Royalties, financial or material support from publishers (The following conflicts were disclosed) **NONE**
8. Medical/Orthopaedic publications editorial/governing board (The following conflicts were disclosed) **NONE**
9. Board member/committee appointments for a society (The following conflicts were disclosed) **NONE**

**Each author must sign, print or type his/her name, date and submit a separate form**

In addition, one BLINDED Conflict of Interest form (no author names used) should be submitted per manuscript with all author disclosures.

Bernhard Holzner

Author Name (Print or Type)

  
Author Signature

16<sup>th</sup> April 2012

Date
